# Supplementary material
Source: PubMed Central journal article supplement (PMC3942367)
Supplement: NIHMS546321-supplement-supplement_1.pdf [file NIHMS546321-supplement-supplement_1.pdf]

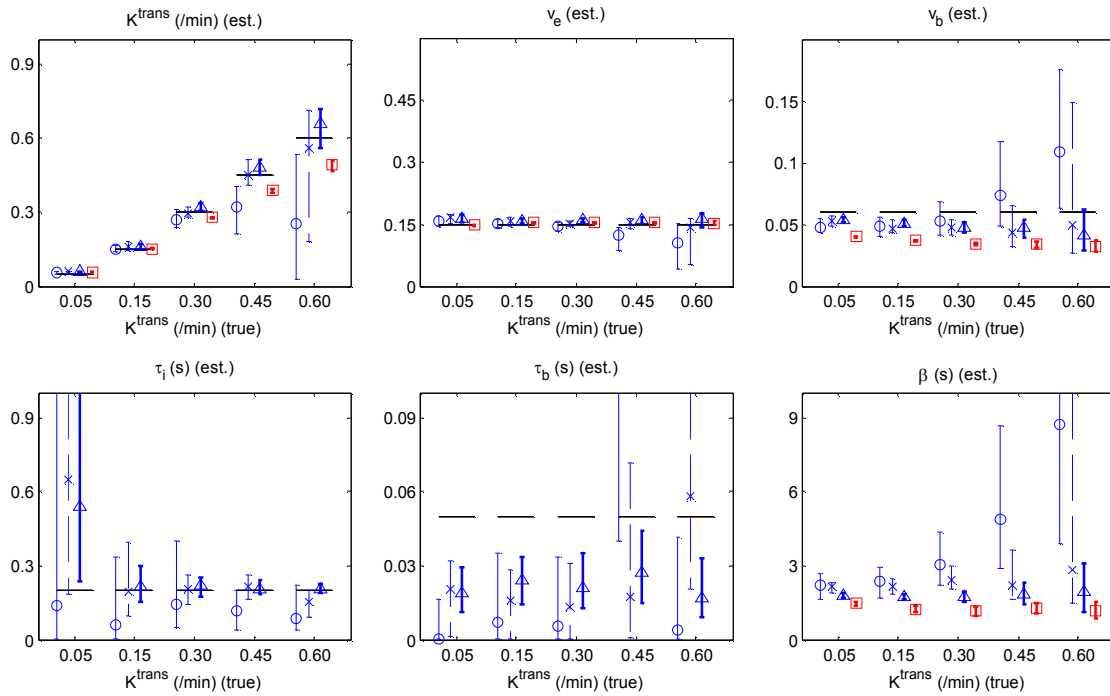

**Supplemental Figure 1.** The accuracy of SSM2 parameters was improved by including a vascular dispersion function  $h(t)=\exp(-t/\beta)/\beta$  which was convolved with the arterial input function  $C_b(t)$  and a higher temporal resolution. The dispersion factor  $\beta$  was an additional free parameter for estimation. The parameters used for the reference data are shown by the horizontal black solid lines; only  $K^{trans}$  was changed during the reference data generation while all the other parameters were fixed. SSM2 parameter estimation was performed with three different temporal resolutions: 5 s/frame (blue circles with thin solid lines), 1 s/frame (blue crosses with thin dashed lines) and 0.2 s/frame (blue triangles with thick solid lines). The results demonstrate that the accuracy of SSM2 can be improved by using the vascular dispersion function and a higher temporal resolution. Also shown are the results of GKM2 with the same vascular dispersion function and a high temporal resolution of 0.2 s/frame (red squares with thick solid lines) which show high precisions in all parameters, but lower accuracy for the  $K^{trans}$  and  $v_b$ .

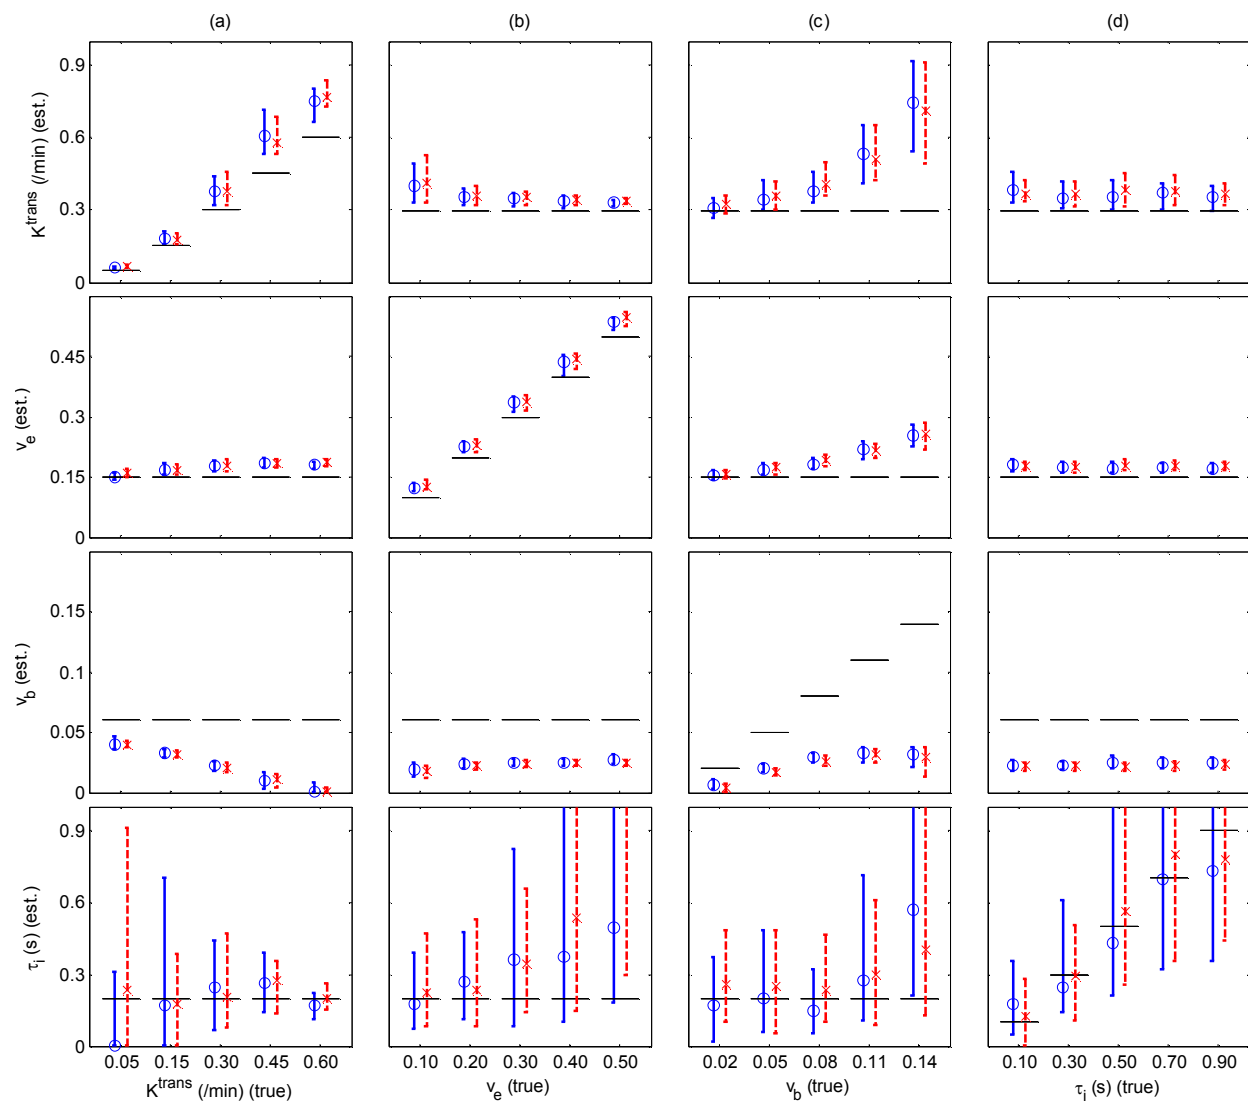

**Supplemental Figure 2.** Comparison of SSM2 parameters estimated when  $\tau_b$  was a free parameter (blue circles, same as shown in Supplemental Figure 3) and when  $\tau_b$  was fixed to 1 ms (red crosses). Each column represents a case where all model parameters were held constant except one parameter;  $K^{trans}$  (a),  $v_e$  (b),  $v_b$  (c) and  $\tau_i$  (d). In each column, the parameter varied for generation of reference data is shown on the x-axis. Plotted are the median and inter-quartile ranges of the estimated parameters from 100 noisy data for each case. Horizontal dashed lines represent true values of the parameters.

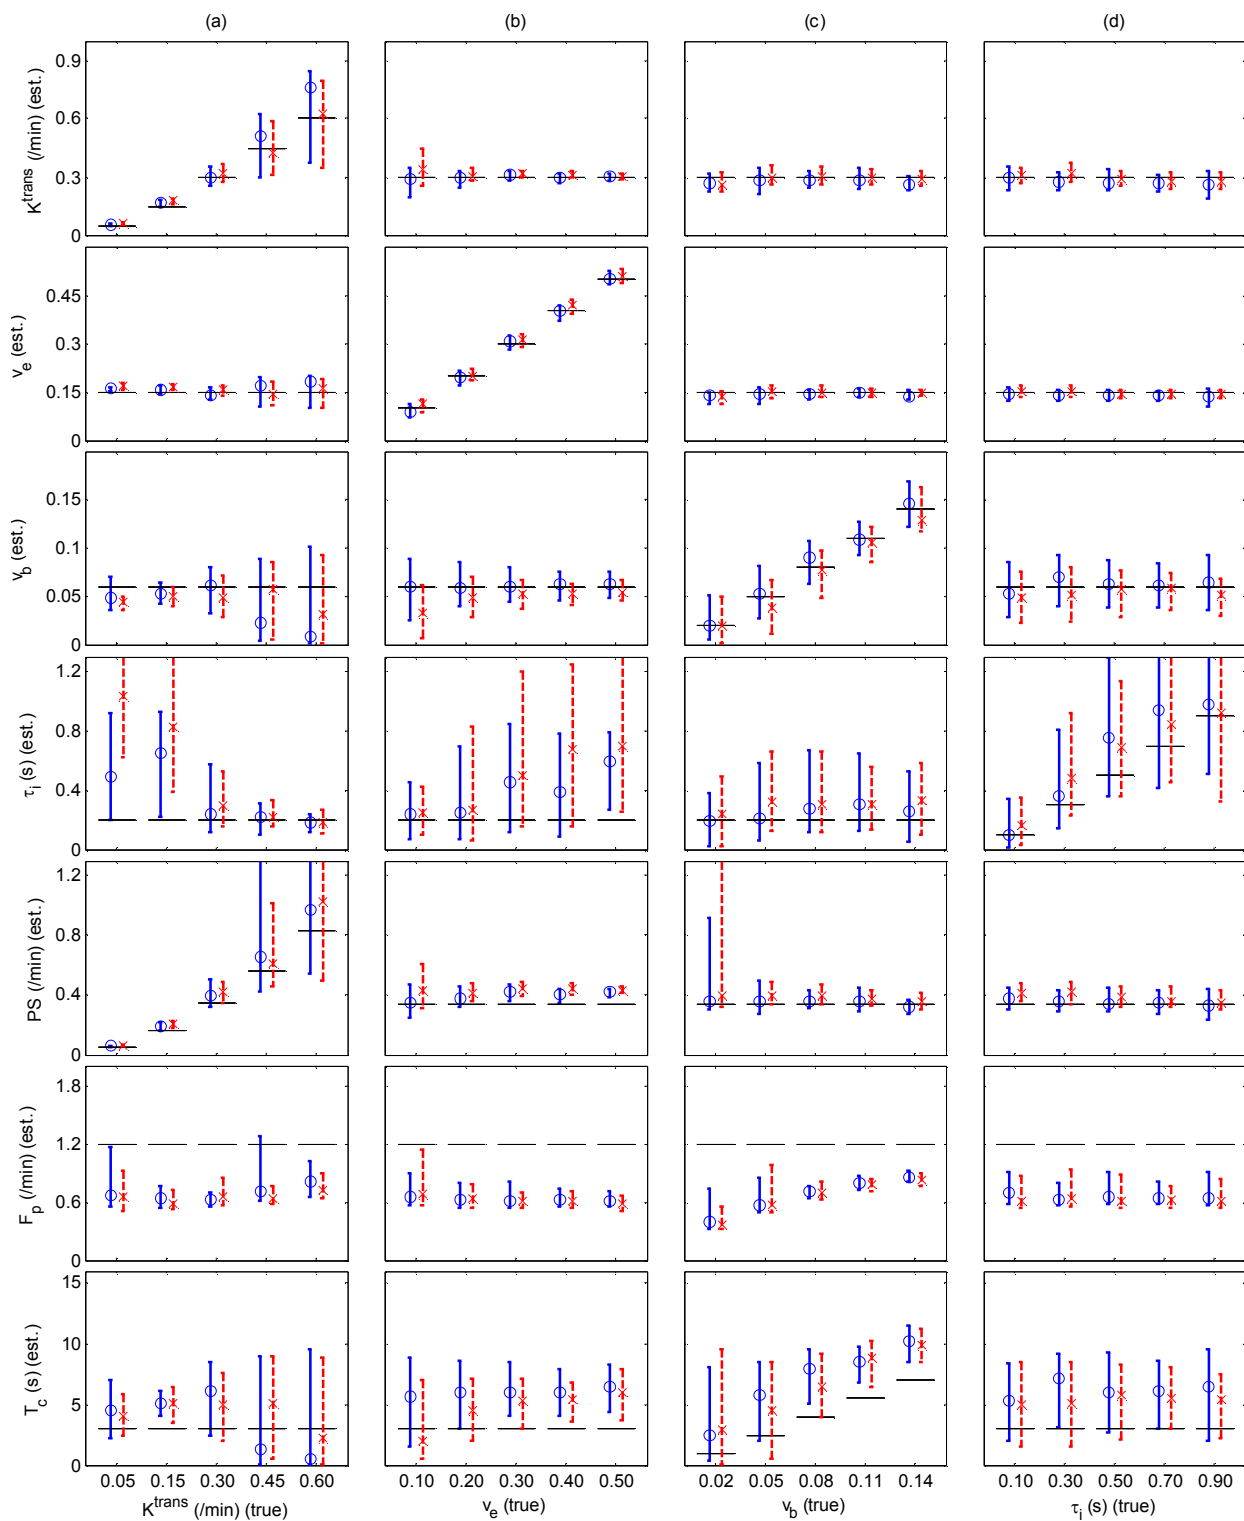

**Supplemental Figure 3.** Comparison of ATHX parameters estimated when  $\tau_b$  was a free parameter (blue circles, same as shown in Supplemental Figure 2) and when  $\tau_b$  was fixed to 1 ms (red crosses). Each column represents a case where all model parameters were held constant except one parameter;  $K^{trans}$  (a),

$v_e$  (b) ,  $v_b$  (c) and  $\tau_i$  (d). In each column, the parameter varied for generation of reference data is shown on the x-axis. Plotted are the median and inter-quartile ranges of the estimated parameters from 100 noisy data for each case. Horizontal dashed lines represent the true values used for the reference data.
